# Supplementary material for: Largely conjugated planar acceptor and rotatable donors to construct AIEgens with large molar extinction coefficients for the detection of metal ions
Source: Royal Society of Chemistry journal article supplement (doi:10.1039/d2nj04684a), 2023-01-01
Supplement: d2nj04684a1.pdf [file d2nj04684a1.pdf]

## Supporting Information

# **Largely conjugated planar acceptor and rotatable donors to construct AIEgens with large molar extinction coefficients for the detection of metal ions**

Ying Zhang<sup>a</sup>, Long Yi<sup>b</sup>, Xiaofang Zhao<sup>c</sup>, Chunbin Li<sup>a</sup>, Lingxiu Liu<sup>a</sup>, Jianye Gong<sup>a</sup>, Lina Feng<sup>a</sup>,  
Jianguo Wang<sup>a</sup>, Zhe Jiao<sup>b,\*</sup> and Guoyu Jiang<sup>a,\*</sup>

<sup>a</sup>College of Chemistry and Chemical Engineering, Inner Mongolia Key Laboratory of Fine Organic Synthesis, Inner Mongolia University, Hohhot 010021, P. R. China.

<sup>b</sup>School of Environment and Civil Engineering, Dongguan University of Technology, Dongguan 523808, P. R. China

<sup>c</sup>International School of Microelectronics, Dongguan University of Technology, Dongguan 523808, P. R. China

---

\* Corresponding author. e-mail: jiaoz@dgut.edu.cn (Z. Jiao); jiangguoyu@mail.ipc.ac.cn (G. Jiang)

## Experiment section:

### Materials and instrumentation

Chemicals were purchased from Energy-Chemical, Sigma-Aldrich, J&K and used without further purification. Solvents and other common reagents were obtained from Sigma-Aldrich.  $^1\text{H}$  NMR and  $^{13}\text{C}$  NMR spectra were measured on a Bruker ARX 500 MHz spectrometer. Matrix assisted laser desorption/ionization time-of-flight (MALDI-TOF) mass spectra were collected on a Bruker SolarixXR high-resolution mass spectrometer. Absorption spectra were measured on a SHIMADZU UV2600i spectrophotometer. Steady-state photoluminescence (PL) spectra were recorded on a HITACHI F-4700 spectrophotometer.

### General procedures for the detection of $\text{Hg}^{2+}$ and $\text{Cu}^{2+}$

Unless otherwise noted, all the spectral measurements were performed in water containing 1% DMF) according to the following procedure. The stock solutions (1.0 mM) of DTPEP or DTPAP were prepared in DMF. 40  $\mu\text{L}$  stock solution was added to 2 mL double distilled water followed by addition of different volume of  $\text{Hg}^{2+}$  or  $\text{Cu}^{2+}$  solution. The obtained solution was transferred to a quartz cell with 1 cm optical length for measurements. In the meantime, the blank solution without  $\text{Hg}^{2+}$  or  $\text{Cu}^{2+}$  was also prepared and measured under the same conditions for comparison.

### Determination of the detection limit

Based on the linear fitting in Figure 3D, 3E and 3F, the detection limit ( $C$ ) is estimated as follows:

$$C = 3\sigma/B$$

Where  $\sigma$  is the standard deviation obtained from three individual fluorescent intensity ratio ( $I/I_0$ ) of DTPEP or DTPAP (20  $\mu\text{M}$ ) without any metal ions and  $B$  is the slope obtained after linear fitting the titration curves within certain ranges.

**Scheme S1.** Synthetic route to DTPEP and DTPAP.

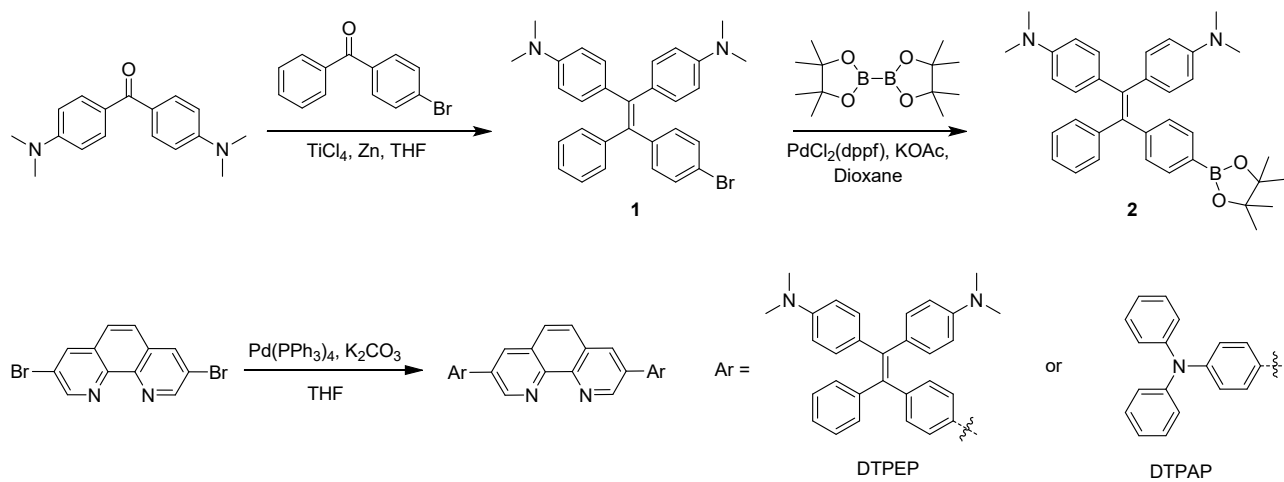

**Figures and tables:**

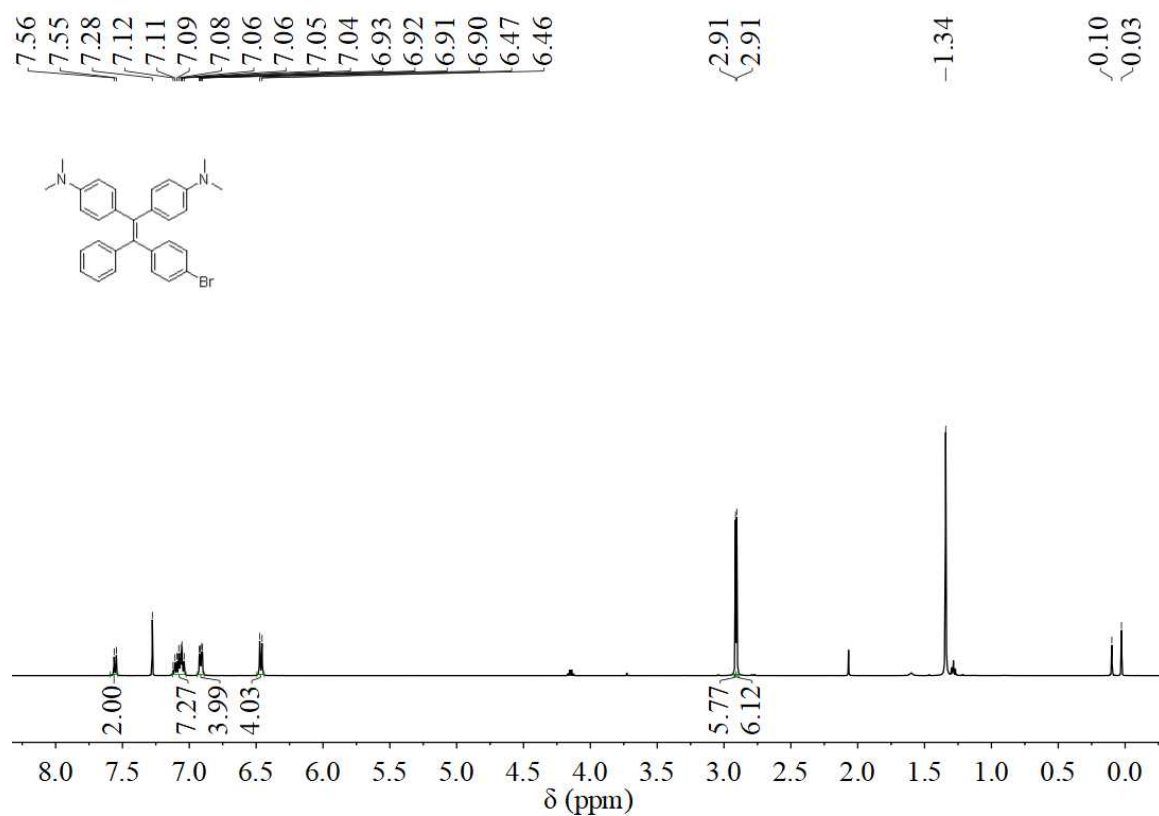

**Figure S1.**  $^1\text{H}$  NMR spectrum of compound 1 in  $\text{CDCl}_3$ .

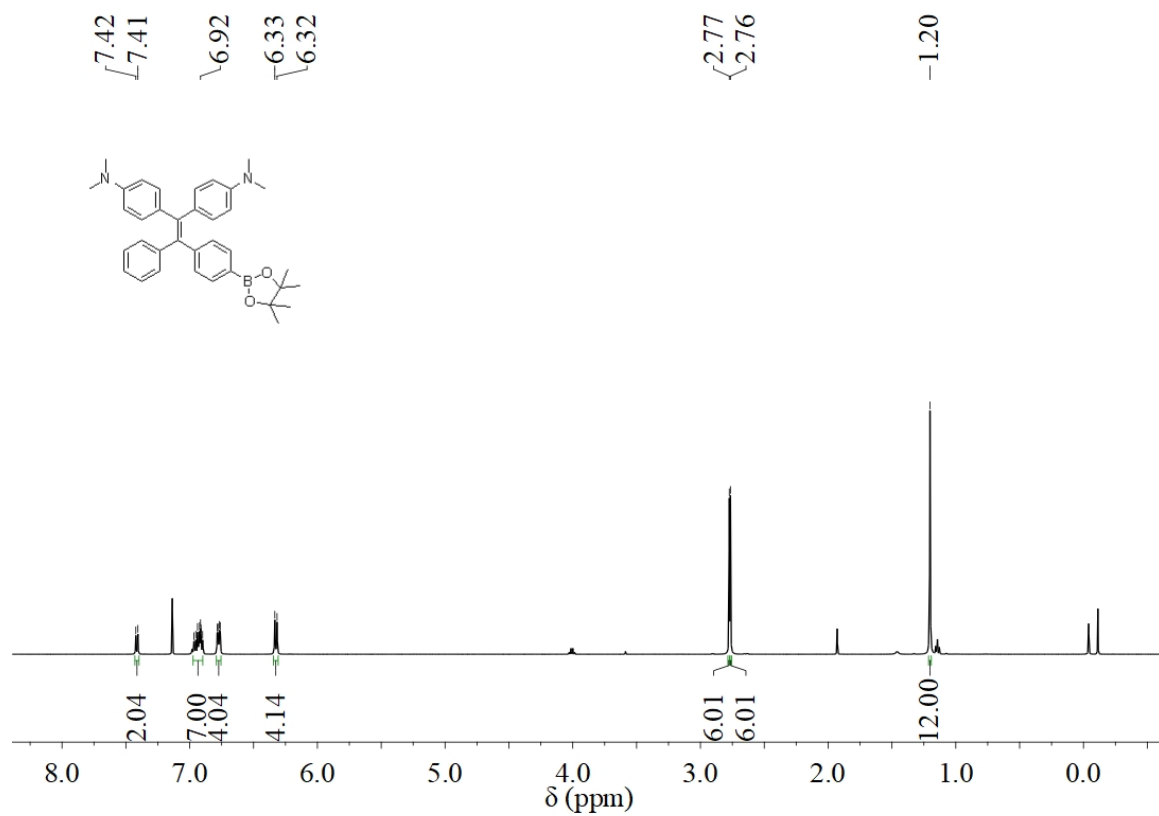

**Figure S2.**  $^1\text{H}$  NMR spectrum of compound 2 in  $\text{CDCl}_3$ .

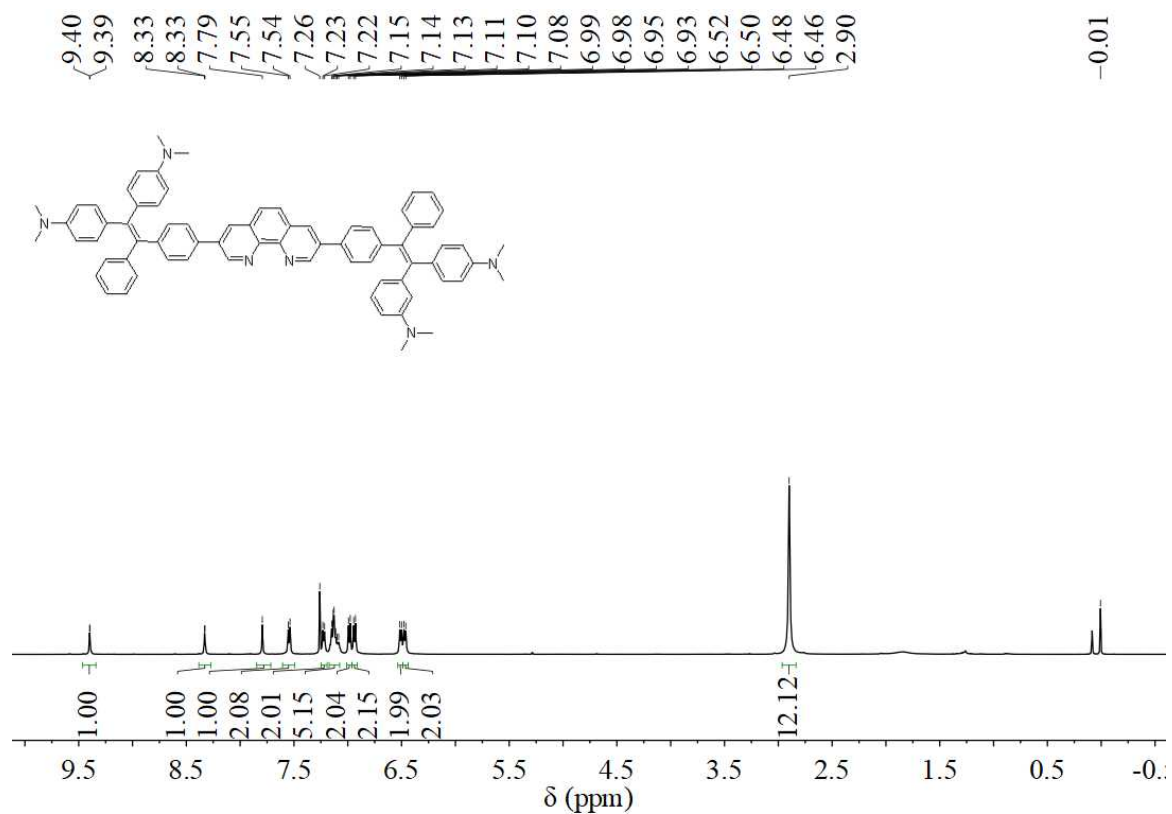

**Figure S3.** <sup>1</sup>H NMR spectrum of DTPEP in CDCl<sub>3</sub>.

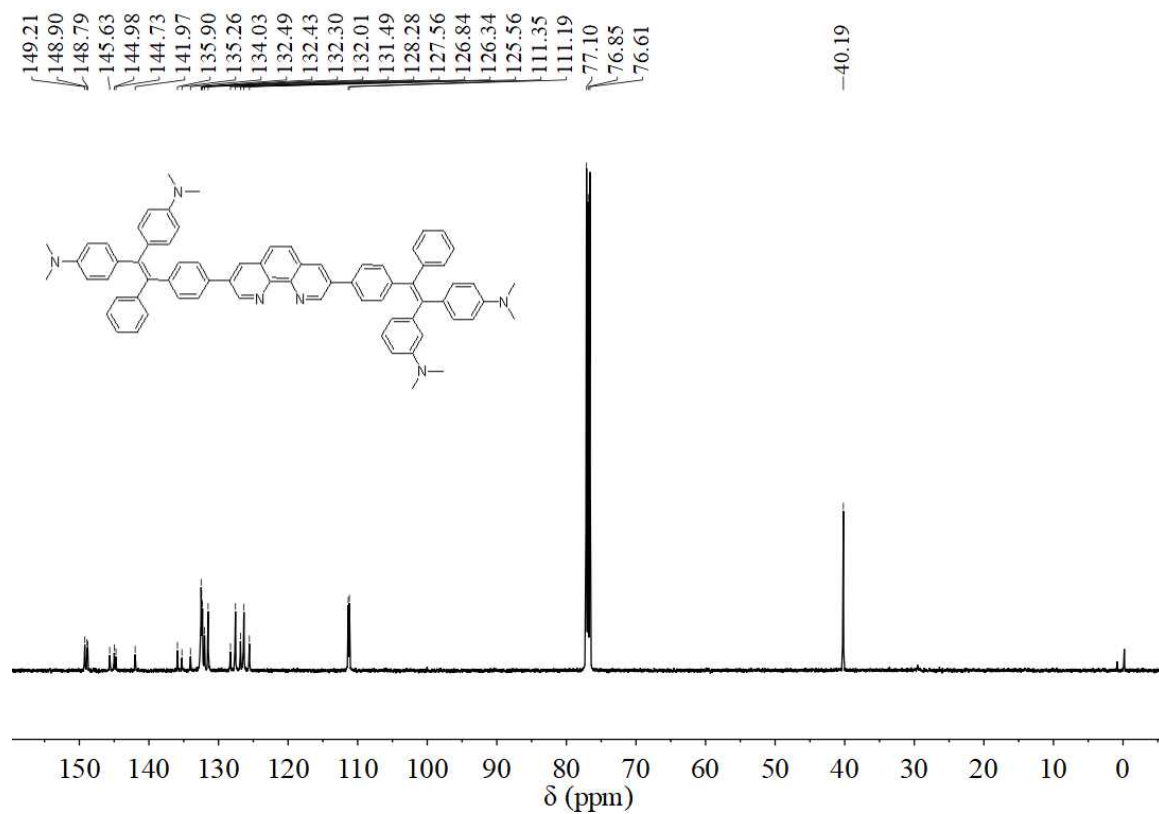

**Figure S4.** <sup>13</sup>C NMR spectrum of DTPEP in *d*<sub>6</sub>-DMSO.

# Formula Predictor Report

Printed at 2021/1/12 14:59:55

|                          |                     |
|--------------------------|---------------------|
| Formula Predictor Result | C72 H64 N6          |
| Mass                     | 1013.52593          |
| Error Margin             | 5 ppm               |
| DBE Range                | Not Used            |
| Electron Ions            | Both configurations |
| HC Ratio                 | Not Used            |
| Nitrogen Rule            | Used                |

| # | Score | Pred. (M)  | Pred. m/z  | Meas. m/z  | Diff. (mDa) | Formulae (M) | Ion                | Diff. (ppm) | Iso Score | DBE  |
|---|-------|------------|------------|------------|-------------|--------------|--------------------|-------------|-----------|------|
| 4 | 31.20 | 1012.51925 | 1013.52652 | 1013.52593 | -0.59       | C72 H64 N6   | [M+H] <sup>+</sup> | -0.582      | 23.83     | 44.0 |

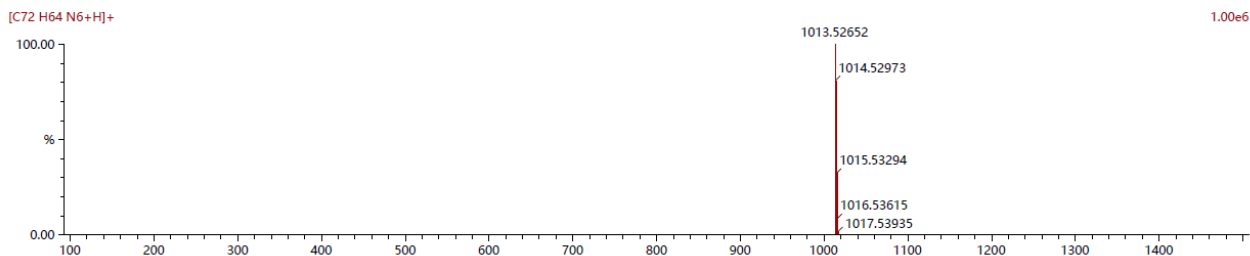

**Figure S5.** HRMS spectrum of DTPEP.

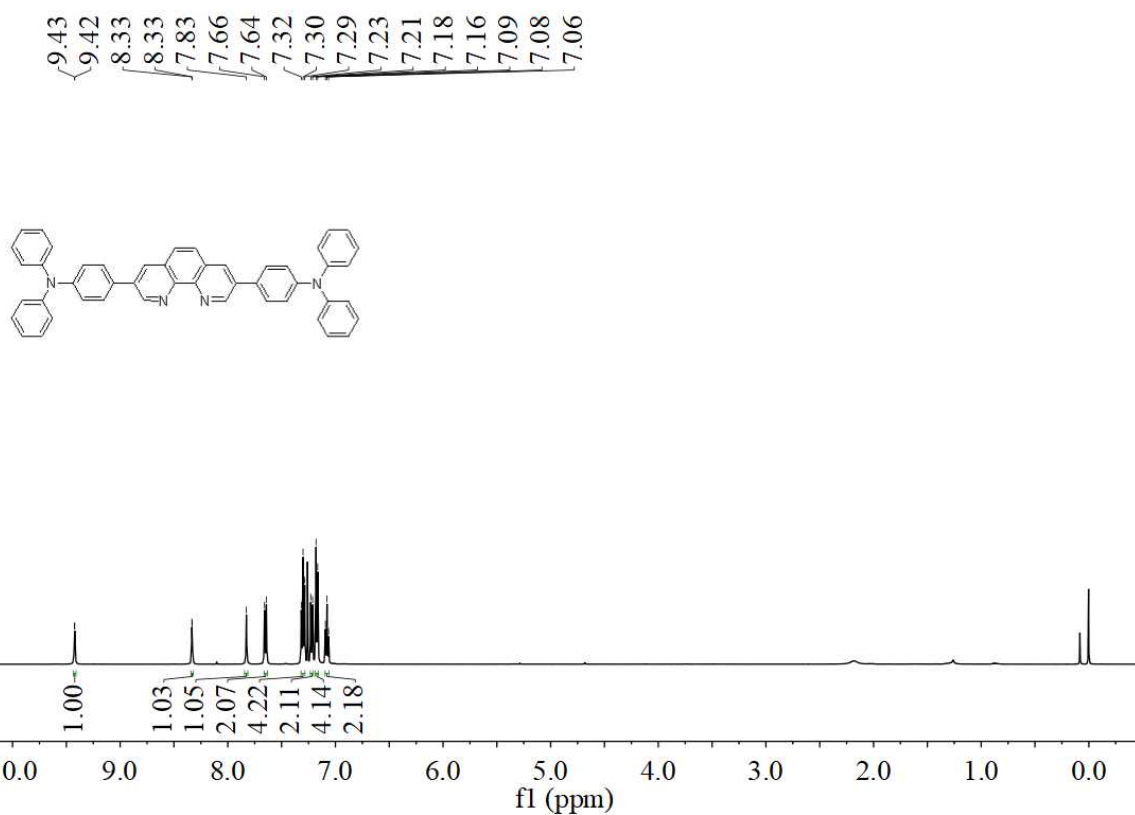

**Figure S6.** <sup>1</sup>H NMR spectrum of DTPAP in CDCl<sub>3</sub>.

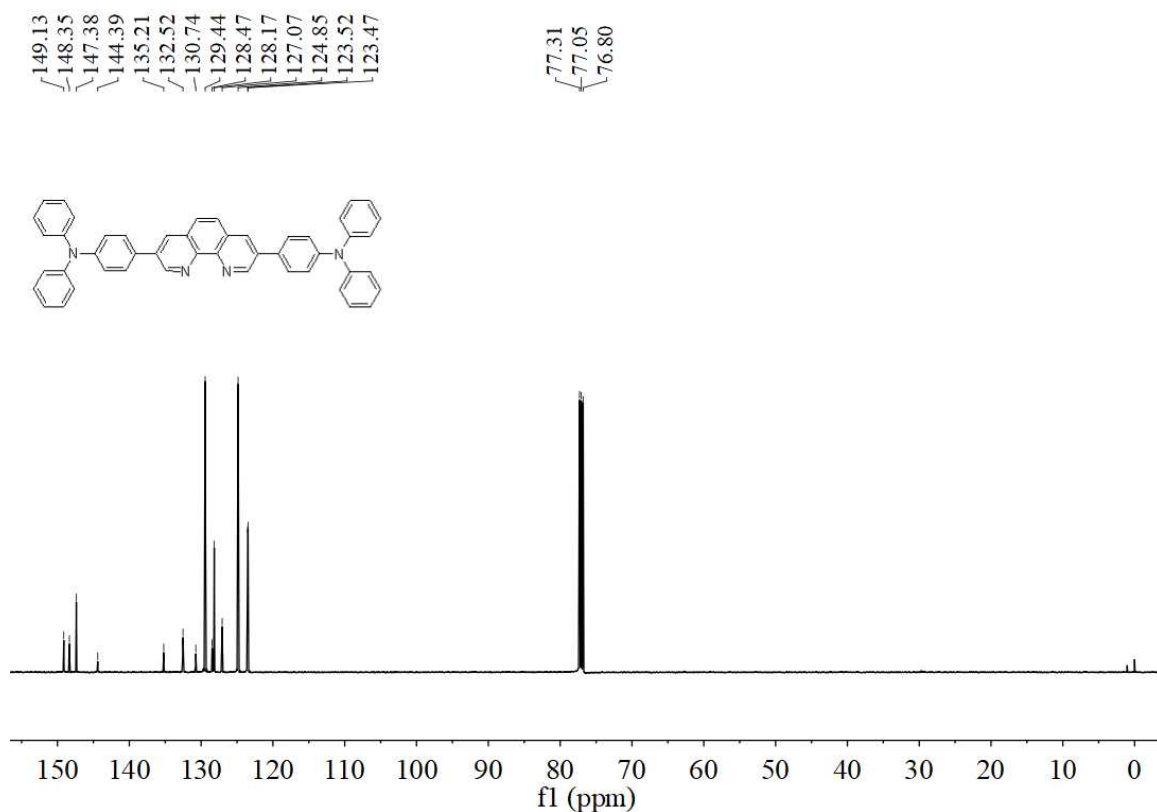

**Figure S7.**  $^{13}\text{C}$  NMR spectrum of DTPAP in  $\text{CDCl}_3$ .

**Elemental Composition Report**

Page 1

**Single Mass Analysis**

Tolerance = 20.0 PPM / DBE: min = -1.5, max = 50.0

Element prediction: Off

Number of isotope peaks used for i-FIT = 3

Monoisotopic Mass, Even Electron Ions

42 formula(e) evaluated with 1 results within limits (up to 50 best isotopic matches for each mass)

Elements Used:

C: 35-50 H: 1-130 N: 1-6

B-DTPA-CN 54 (0.316)

1: TOF MS ES+

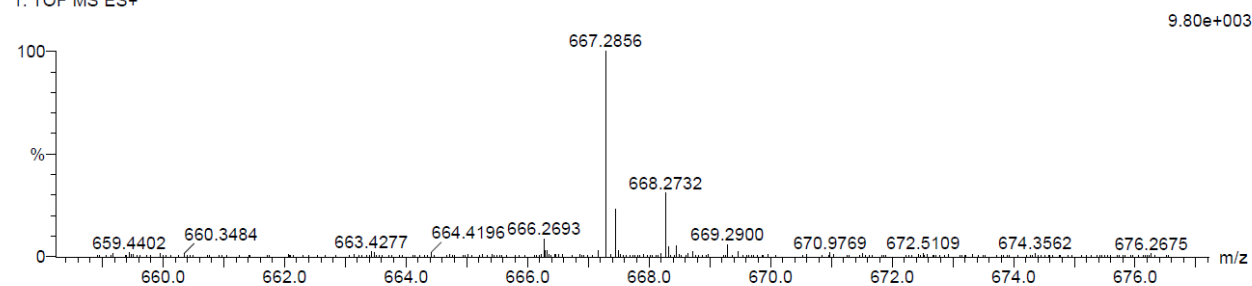

Minimum: -1.5  
Maximum: 5.0 20.0 50.0

| Mass     | Calc. Mass | mDa  | PPM  | DBE  | i-FIT | Norm | Conf(%) | Formula    |
|----------|------------|------|------|------|-------|------|---------|------------|
| 667.2856 | 667.2862   | -0.6 | -0.9 | 33.5 | 370.7 | n/a  | n/a     | C48 H35 N4 |

**Figure S8.** HRMS spectrum of DTPAP.

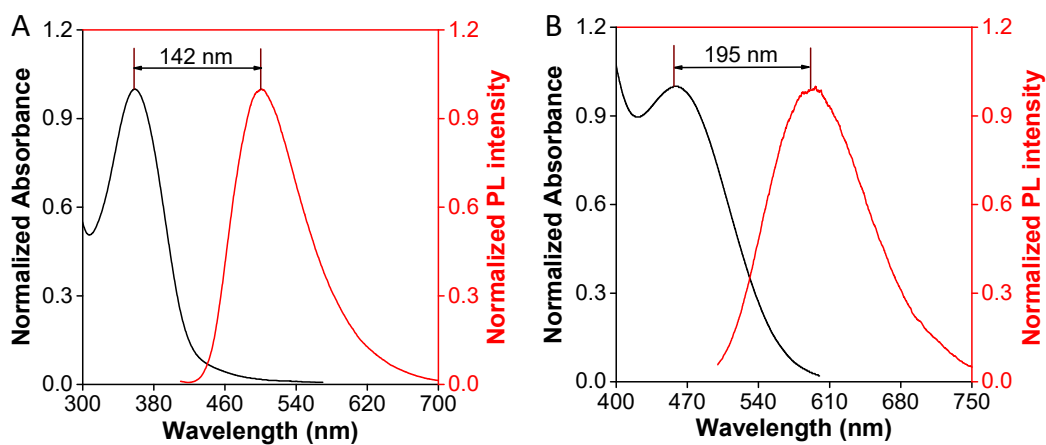

**Figure S9.** Normalized absorption and PL spectra of DTPAP (A) and DTPEP (B) in water with 1% DMF.

**Table S1.** The quantum yields of DTPAP and DTPEP.

| Probe | $\lambda_{\text{ex}}$ (nm) | Solution <sup>a</sup> | Aggregates <sup>b</sup> | Solid |
|-------|----------------------------|-----------------------|-------------------------|-------|
| DTPAP | 395                        | 84%                   | 34%                     | 4.5%  |
| DTPEP | 400                        | 0.4%                  | 2.7%                    | 5.6%  |

<sup>a</sup>Data were measured in DMF solution.

<sup>b</sup>Data were measured in DMF/H<sub>2</sub>O mixed solution with 90% H<sub>2</sub>O fraction.

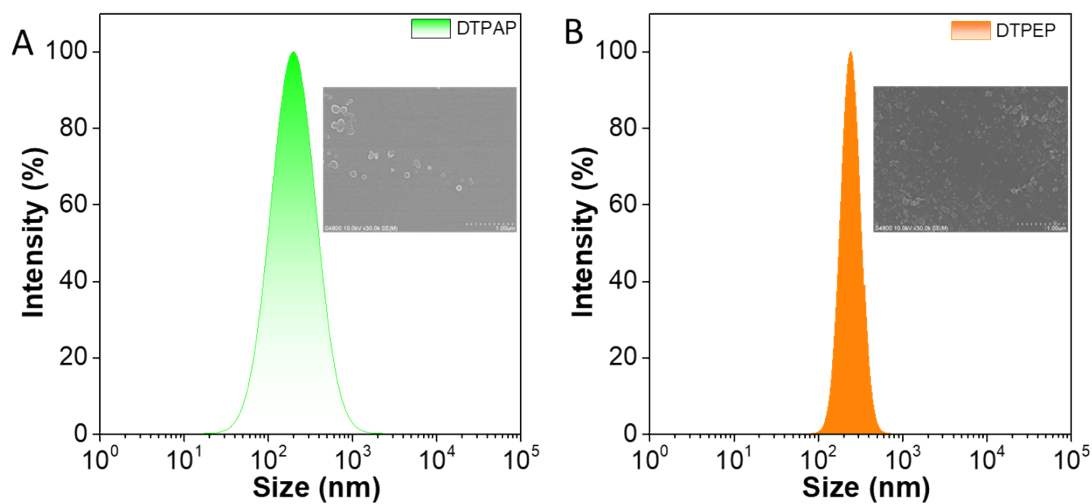

**Figure S10.** The DLS analysis of DTPAP (A) in DMF/H<sub>2</sub>O solution with 10% DMF and DTPEP (B) in pure DMF. Insets show the corresponding SEM images.



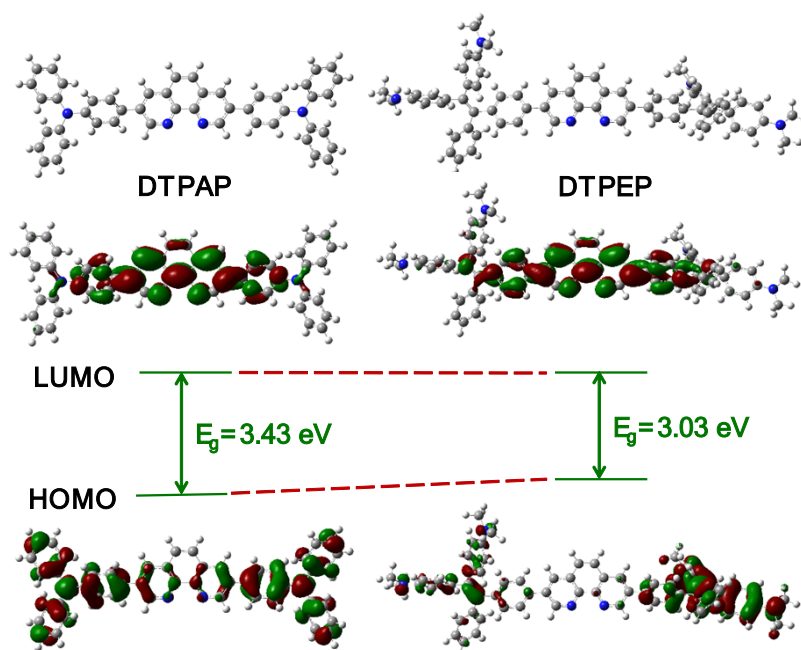

**Figure S11.** Optimized molecular structures and calculated HOMO and LUMO geometries for compound DTPEP and DTPAP.

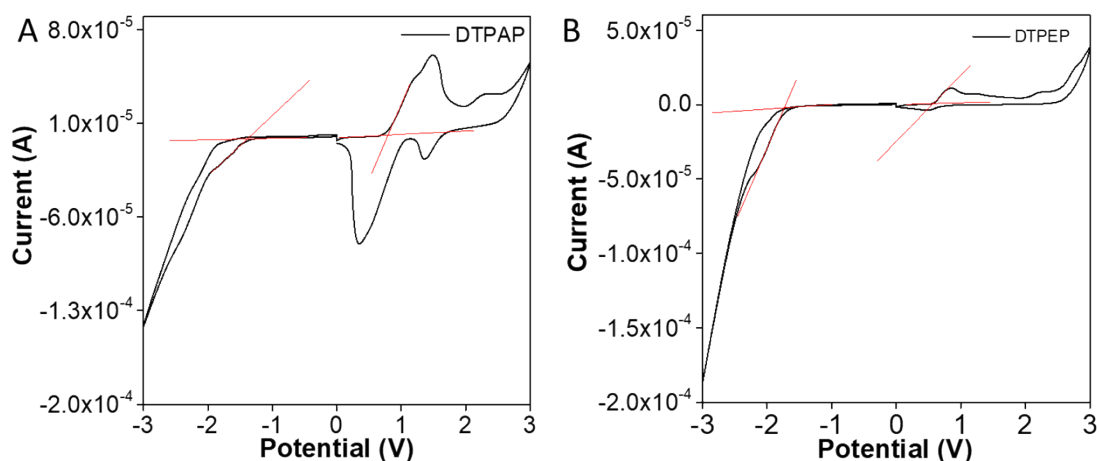

**Figure S12.** Cyclic voltammograms of 2 mM DTPAP (A) and DTPEP(B) measured in dichloromethane solution containing 0.1 M  $\text{Bu}_4\text{NPF}_6$  as the supporting electrolyte at room temperature. Gold electrodes were used as a working electrode, and the scan rate was set at  $50 \text{ mV} \cdot \text{s}^{-1}$ .

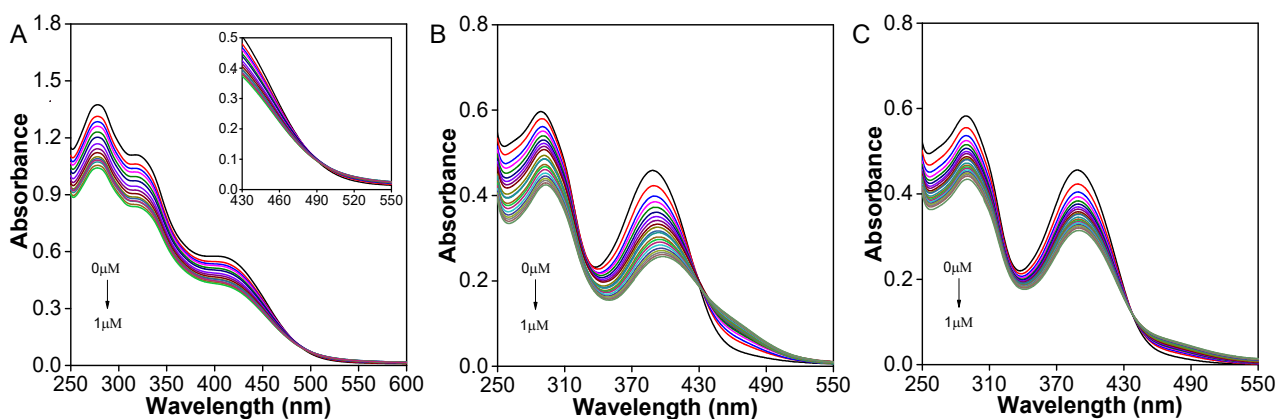

**Figure S13.** The UV-vis absorption spectra of DTPEP (A) and DTPAP (B and C) upon the addition of Hg<sup>2+</sup> (A and B) or Cu<sup>2+</sup> (C).

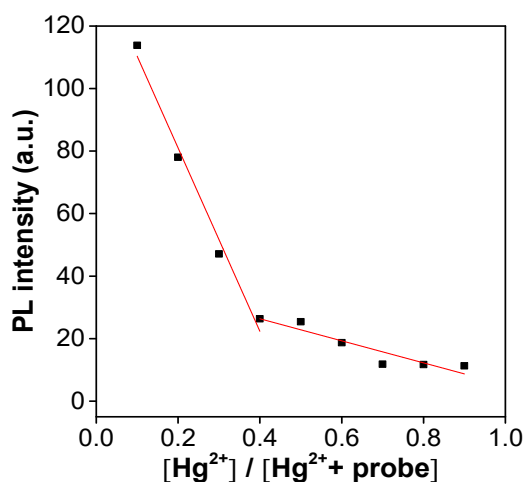

**Figure S14.** (A) The Job's plot between DTPEP probe and Hg<sup>2+</sup>, with a total concentration of ( $[\text{Hg}^{2+}] + [\text{DTPAP}] = 5 \times 10^{-6} \text{ mol L}^{-1}$ ).

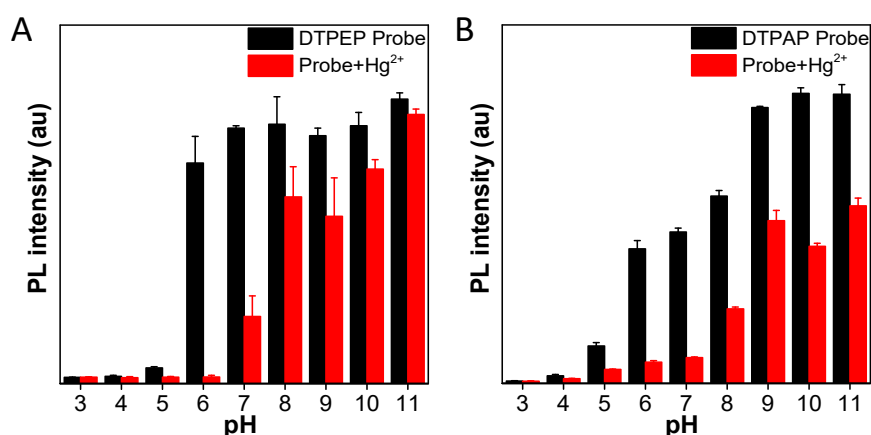

**Figure S15.** Fluorescence intensity of DTPEP (A) and DTPAP (B) (20.0 μM) in the presence and absence of Hg<sup>2+</sup> (20.0 μM) under different pH environments ( $\lambda_{\text{ex}} = 395 \text{ nm}$ ).

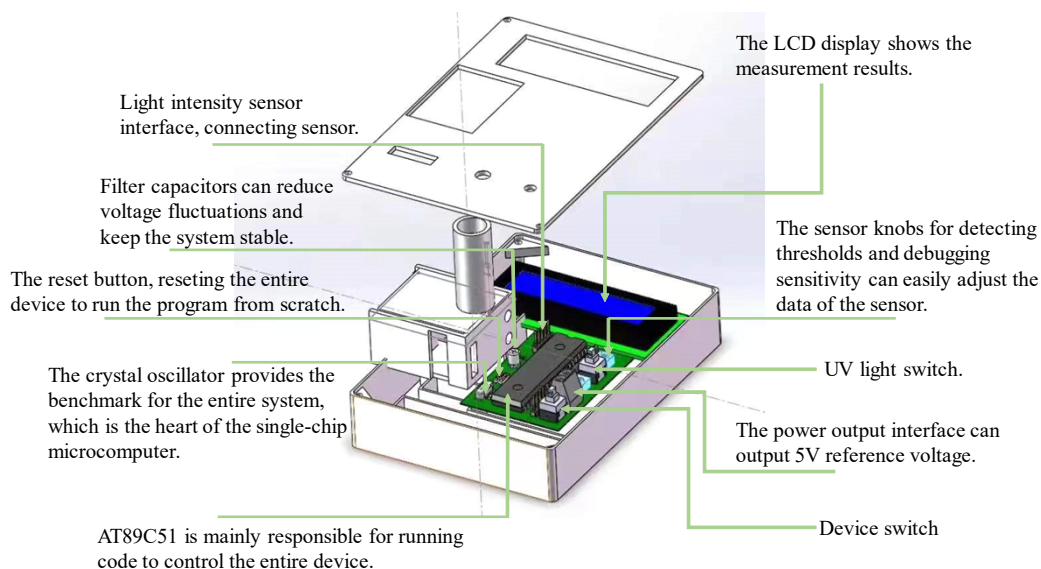

**Figure S16.** Structure of the portable device for detection of  $\text{Hg}^{2+}$  by using DTPEP.

**Table S2.** Comparison of DTPEP with some recently reported AIE-active fluorescent probes for  $\text{Hg}^{2+}$ .

| AIEgen-based fluorescent probes | $\lambda_{\text{em}}$ (nm) | LOD               | Portable device | Ref              |
|---------------------------------|----------------------------|-------------------|-----------------|------------------|
|                                 | < 500                      | 28.6 nM           | No              | [1]              |
|                                 | 488                        | 1.8 $\mu\text{M}$ | No              | [2]              |
|                                 | 525                        | 60.7 nM           | No              | [3]              |
|                                 | 550                        | 10.5 nM           | No              | [4]              |
|                                 | 575                        | 18.7 nM           | Yes             | <i>This work</i> |

## References

- [1] P. Wang, S. Xue, B. Chen, F. Liao, A novel peptide-based fluorescent probe for highly selective detection of mercury (II) ions in real water samples and living cells based on aggregation-induced emission effect, *Anal. Bioanal. Chem.* 414 (2022) 4717-4726.
- [2] K.-R. Zhang, M. Hu, J. Luo, F. Ye, T.-T. Zhou, Y.-X. Yuan, M.-L. Gao, Y.-S. Zheng, *Pseudo* -crown ether having AIE and PET effects from a TPE-CD conjugate for highly selective detection of mercury ions, *Chin. Chem. Lett.* 33 (2022) 1505-1510.
- [3] J. Wang, J. Tong, Z.-F. Wang, Q. Yuan, X.-Y. Wang, S.-Y. Yu, B. Z. Tang, Highly specific and selective fluorescent chemosensor for sensing of Hg(II) by NH-pyrazolate-functionalized AIEgens, *Anal. Chim. Acta* 1208 (2022) 339824.
- [4] M. Selvaraj, K. Rajalakshmi, D.-H. Ahn, S.-J. Yoon, Y.-S. Nam, Y. Lee, Y. Xu, J.-W. Song, K.-B. Lee, Tetraphenylethene-based fluorescent probe with aggregation-induced emission behavior for Hg<sup>2+</sup> detection and its application, *Anal. Chim. Acta* 1148 (2021) 238178.
